# Supplementary material
Source: PubMed Central journal article supplement (PMC3806528)
Supplement: supp_mct196_mct196supp.pdf [file supp_mct196_mct196supp.pdf]

## SUPPLEMENTARY DATA

TABLE S1. List of olive cultivars characterized in the present study. Their origin (country, collection or field collect) and ptDNA haplotype (ptDNA) are given. Most cultivars were collected in the Olive World Germplasm Bank of Marrakech (OWGB-Marrakech). All accessions were analyzed using ten nuclear microsatellites. Accessions of each country are *a priori* assigned to a geographic zone (i.e. West, Central or East). \*In order to exclude possible clonal variants, accessions that differed by only one or two alleles were considered as being the same cultivar.

| Region of origin  | Cultivars                                                     | Country                   | Origin                                   | ptDNA |
|-------------------|---------------------------------------------------------------|---------------------------|------------------------------------------|-------|
| Morocco (West)    | Berri Meslal                                                  | Morocco                   | OWGB-Marrakech                           | E 1-1 |
|                   | Berri Meslal3                                                 | Morocco                   | OWGB-Marrakech                           | E 3-3 |
|                   | Bouchouika                                                    | Morocco                   | INRAM                                    | E 1-1 |
|                   | Bouchouk laghlid                                              | Morocco                   | OWGB-Marrakech                           | E 1-1 |
|                   | Bouchouk laghlid                                              | Morocco                   | Field collection                         | E 1-1 |
|                   | Bouchouk rkik                                                 | Morocco                   | OWGB-Marrakech                           | E 1-1 |
|                   | Chaouen, local type 2                                         | Morocco                   | Field collect                            | E 2-4 |
|                   | Dehbia                                                        | Morocco                   | OWGB-Marrakech                           | E 1-1 |
|                   | Hamrani / ZZ6*                                                | Morocco                   | OWGB-Marrakech                           | E 1-1 |
|                   | Hamrani 2                                                     | Morocco                   | OWGB-Marrakech                           | E 1-1 |
|                   | Marrakech, local type 40                                      | Morocco                   | Menara garden                            | E 2-1 |
|                   | Meslala - Marrakech                                           | Morocco                   | OWGB-Marrakech                           | E 1-3 |
|                   | Ouazzane, local type 5                                        | Morocco                   | Field collect                            | E 1-1 |
|                   | Ouazzane, local type 7                                        | Morocco                   | Field collect                            | E 3-2 |
|                   | Picholine Marocaine / Haouzia / Menara / Sigoise / Fakhoukha* | Morocco / Algeria         | OWGB-Marrakech, INRAM &<br>Field collect | E 1-1 |
|                   | Ronde de la Ménara                                            | Morocco                   | OWGB-Marrakech                           | E 1-1 |
|                   | Sefrou, local type 18                                         | Morocco                   | Field collect                            | E 3-2 |
|                   | ZDH1 / ZDH3 / ZZ1 / ZZ10 / Sigoise 1 / Sinawi*                | Morocco / Algeria / Egypt | OWGB-Marrakech                           | E 1-1 |
|                   | ZDH4                                                          | Morocco                   | OWGB-Marrakech                           | E 1-1 |
|                   | ZDH6                                                          | Morocco                   | OWGB-Marrakech                           | E 1-1 |
|                   | Zeitun lkhl                                                   | Morocco                   | OWGB-Marrakech                           | E 1-1 |
|                   | Zms1                                                          | Morocco                   | OWGB-Marrakech                           | E 1-1 |
|                   | Zms2 / ZDH7*                                                  | Morocco                   | OWGB-Marrakech                           | E 1-1 |
| Zmj1 / Lastovka * | Morocco / Croatia                                             | OWGB-Marrakech            | E 1-1                                    |       |
| Zsb10             | Morocco                                                       | OWGB-Marrakech            | E 1-1                                    |       |
| Zsb2              | Morocco                                                       | OWGB-Marrakech            | E 1-1                                    |       |

Table S1 (continued)

| Region of origin  | Cultivars                               | Country           | Origin         | ptDNA |
|-------------------|-----------------------------------------|-------------------|----------------|-------|
| Algeria (Central) | Abani                                   | Algeria           | OWGB-Marrakech | E 2-1 |
|                   | Aberkane                                | Algeria           | OWGB-Marrakech | E 1-1 |
|                   | Aghchren de Titest                      | Algeria           | OWGB-Marrakech | E 1-1 |
|                   | Aghchren d'Elousseur / Azeradj Tamorka* | Algeria           | OWGB-Marrakech | E 1-1 |
|                   | Agrarez                                 | Algeria           | OWGB-Marrakech | E 1-1 |
|                   | Aguentaou                               | Algeria           | OWGB-Marrakech | E 1-2 |
|                   | Aharoune                                | Algeria           | OWGB-Marrakech | E 3-2 |
|                   | Ahia Ousbaa                             | Algeria           | OWGB-Marrakech | E 2-1 |
|                   | Aïmel                                   | Algeria           | OWGB-Marrakech | E 1-1 |
|                   | Akenane                                 | Algeria           | OWGB-Marrakech | E 1-1 |
|                   | Akerma                                  | Algeria           | OWGB-Marrakech | E 1-1 |
|                   | Azeboudj de Khirane                     | Algeria           | OWGB-Marrakech | E 2-1 |
|                   | Azeradj                                 | Algeria           | OWGB-Marrakech | E 1-1 |
|                   | Blanquette de Castu                     | Algeria           | OWGB-Marrakech | E 1-1 |
|                   | Blanquette de Guelma                    | Algeria           | OWGB-Marrakech | E 1-2 |
|                   | Bouchouk Lafayette                      | Algeria           | OWGB-Marrakech | E 1-1 |
|                   | Bouchouk Soummam                        | Algeria           | OWGB-Marrakech | E 1-1 |
|                   | Boukaïla                                | Algeria           | OWGB-Marrakech | E 1-1 |
|                   | Bouricha                                | Algeria           | OWGB-Marrakech | E 3-3 |
|                   | Chemlal de Kabylie                      | Algeria           | OWGB-Marrakech | E 3-2 |
|                   | Ferkani / Jemri bouchouka*              | Algeria / Tunisia | OWGB-Marrakech | E 1-1 |
|                   | Grosse du Hamma                         | Algeria           | OWGB-Marrakech | E 1-2 |
|                   | Hamra                                   | Algeria           | OWGB-Marrakech | E 3-3 |
|                   | Ifiri                                   | Algeria           | OWGB-Marrakech | E 1-1 |
|                   | Khadraïa                                | Algeria           | OWGB-Marrakech | E 2-1 |
|                   | Limli                                   | Algeria           | OWGB-Marrakech | E 1-1 |
|                   | Longue de Meliana                       | Algeria           | OWGB-Marrakech | E 1-1 |
|                   | Mekki                                   | Algeria           | OWGB-Marrakech | E 1-1 |
|                   | Neb jmel                                | Algeria           | OWGB-Marrakech | E 2-1 |
|                   | Ronde de Meliana                        | Algeria           | OWGB-Marrakech | E 1-1 |
|                   | Rougette de Metidja                     | Algeria           | OWGB-Marrakech | E 1-1 |
|                   | Souidi                                  | Algeria           | OWGB-Marrakech | E 2-1 |
| Taksrit           | Algeria                                 | OWGB-Marrakech    | E 1-1          |       |

Table S1 (continued)

| Region of origin                | Cultivars                         | Country                | Origin                         | ptDNA |
|---------------------------------|-----------------------------------|------------------------|--------------------------------|-------|
| <b>Algeria (Central)</b>        | Tefah                             | Algeria                | OWGB-Marrakech                 | E 1-1 |
|                                 | Zeboudj Boudoudan                 | Algeria                | OWGB-Marrakech                 | E 1-1 |
|                                 | Zeletni                           | Algeria                | OWGB-Marrakech                 | E 2-1 |
| <b>Tunisia (Central)</b>        | Barouni                           | Tunisia                | OWGB-Marrakech                 | E 1-1 |
|                                 | Beldi                             | Tunisia                | OWGB-Marrakech                 | E 1-1 |
|                                 | Besbessi                          | Tunisia                | OWGB-Marrakech                 | E 1-1 |
|                                 | Chemchali nord                    | Tunisia                | OWGB-Marrakech                 | E 1-2 |
|                                 | Chemlali chouamekh                | Tunisia                | OWGB-Marrakech                 | E 1-1 |
|                                 | Chemlali nord                     | Tunisia                | OWGB-Marrakech                 | E 1-1 |
|                                 | Chetoui                           | Tunisia                | OWGB-Marrakech                 | E 1-2 |
|                                 | Derras                            | Tunisia                | OWGB-Marrakech                 | E 1-2 |
|                                 | Dhokar / Taounate, local type 15* | Tunisia/Morocco        | OWGB-Marrakech & Field collect | L 1-1 |
|                                 | Drissi                            | Tunisia                | OWGB-Marrakech                 | E 1-2 |
|                                 | Fouji vert                        | Tunisia                | OWGB-Marrakech                 | E 1-1 |
|                                 | Gerboui Nord                      | Tunisia                | OWGB-Marrakech                 | E 1-2 |
|                                 | Jemri                             | Tunisia                | OWGB-Marrakech                 | E 1-1 |
|                                 | Marsaline                         | Tunisia                | OWGB-Marrakech                 | E 1-1 |
|                                 | Meski                             | Tunisia                | OWGB-Marrakech                 | E 1-1 |
|                                 | Neb jmel                          | Tunisia                | OWGB-Marrakech                 | E 1-1 |
|                                 | Rkhami                            | Tunisia                | OWGB-Marrakech                 | E 1-2 |
|                                 | Sayali                            | Tunisia                | OWGB-Marrakech                 | E 1-1 |
|                                 | Tounsi                            | Tunisia                | OWGB-Marrakech                 | E 1-1 |
| Tounsi Gafsa                    | Tunisia                           | OWGB-Marrakech         | E 1-1                          |       |
| Zalmati nord                    | Tunisia                           | OWGB-Marrakech         | E 1-1                          |       |
| Zarazzi / TL11*                 | Tunisia                           | INRAF & Field collects | E 3-2                          |       |
| <b>Iberian Peninsula (West)</b> | Acebuchera                        | Spain                  | OWGB-Marrakech                 | E 1-1 |
|                                 | Alameno blanco                    | Spain                  | OWGB-Marrakech                 | E 1-1 |
|                                 | Alameno de Marchene               | Spain                  | OWGB-Marrakech                 | E 1-1 |

Table S1 (continued)

| Region of origin               | Cultivars                  | Country        | Origin         | ptDNA |
|--------------------------------|----------------------------|----------------|----------------|-------|
| Iberian Peninsula (West)       | Alameno de Montilla        | Spain          | OWGB-Marrakech | E 1-1 |
|                                | Amargoso                   | Spain          | OWGB-Marrakech | E 1-1 |
|                                | Arbequina                  | Spain          | OWGB-Marrakech | E 1-1 |
|                                | Azul                       | Spain          | OWGB-Marrakech | E 1-1 |
|                                | Biancolilla                | Spain          | OWGB-Marrakech | E 1-1 |
|                                | Blanqueta                  | Spain          | WOGB-Cordoue   | E 1-3 |
|                                | Bolvino                    | Spain          | OWGB-Marrakech | E 1-1 |
|                                | Borriolenca                | Spain          | OWGB-Marrakech | E 3-1 |
|                                | Canivano negro             | Spain          | OWGB-Marrakech | E 1-1 |
|                                | Carasquillo                | Spain          | OWGB-Marrakech | E 1-1 |
|                                | Carresqueno de Alcandate   | Spain          | OWGB-Marrakech | E 1-1 |
|                                | Carresqueño de Jumilla 1   | Spain          | OWGB-Marrakech | E 1-1 |
|                                | Carresqueño de Jumilla 2   | Spain          | OWGB-Marrakech | E 1-1 |
|                                | Chorro                     | Spain          | OWGB-Marrakech | E 1-1 |
|                                | Corbelia                   | Spain          | OWGB-Marrakech | E 3-1 |
|                                | Cornezuelo de Jaen         | Spain          | OWGB-Marrakech | E 1-1 |
|                                | Cornicabra                 | Spain          | OWGB-Marrakech | E 1-1 |
|                                | Dulzal                     | Spain          | OWGB-Marrakech | E 1-1 |
|                                | Empeltre                   | Spain          | OWGB-Marrakech | E 1-1 |
|                                | Enagua de arenas           | Spain          | OWGB-Marrakech | E 1-1 |
|                                | Escarbajuelo de Ubeda      | Spain          | OWGB-Marrakech | E 1-1 |
|                                | Fulla de salce             | Spain          | OWGB-Marrakech | E 3-1 |
|                                | Habechuelero de Garazaleme | Spain          | OWGB-Marrakech | E 1-1 |
|                                | Hojiblanca                 | Spain          | OWGB-Marrakech | E 1-1 |
|                                | Jabaluna                   | Spain          | OWGB-Marrakech | E 1-1 |
|                                | Lechin de Granada          | Spain          | OWGB-Marrakech | E 1-1 |
|                                | Lechin de Sevilla          | Spain          | OWGB-Marrakech | E 2-3 |
|                                | Lentisca 1                 | Spain          | OWGB-Marrakech | E 1-1 |
|                                | Lentisca 2                 | Spain          | OWGB-Marrakech | E 1-1 |
|                                | Limoncillo                 | Spain          | OWGB-Marrakech | E 1-1 |
|                                | Llomete                    | Spain          | OWGB-Marrakech | E 3-1 |
|                                | Lloron de atarafe          | Spain          | OWGB-Marrakech | E 1-1 |
|                                | Lloron de Izanalloz        | Spain          | OWGB-Marrakech | E 1-1 |
|                                | Lloron de ronda            | Spain          | OWGB-Marrakech | E 1-1 |
|                                | Loamine                    | Spain          | OWGB-Marrakech | E 1-1 |
|                                | Machorron                  | Spain          | OWGB-Marrakech | E 1-1 |
| Manzanilla de Almería          | Spain                      | WOGB-Cordoue   | E 1-1          |       |
| Manzanilla Caserina (Azeitera) | Spain                      | OWGB-Marrakech | E 1-1          |       |

Table S1 (continued)

| Region of origin         | Cultivars                                          | Country                      | Origin         | ptDNA |
|--------------------------|----------------------------------------------------|------------------------------|----------------|-------|
| Iberian Peninsula (West) | Manzanilla de Abla                                 | Spain                        | OWGB-Marrakech | E 1-1 |
|                          | Manzanilla de Agua                                 | Spain                        | OWGB-Marrakech | E 1-1 |
|                          | Manzanilla de Hellin                               | Spain                        | OWGB-Marrakech | E 1-1 |
|                          | Manzanilla de Montefrío                            | Spain                        | OWGB-Marrakech | E 1-1 |
|                          | Manzanilla de Sevilla / Chesna / Khello / Mission* | Spain / Syria / South Africa | OWGB-Marrakech | E 1-1 |
|                          | Manzanilla de Tortosa                              | Spain                        | OWGB-Marrakech | E 1-1 |
|                          | Meloncillo                                         | Spain                        | OWGB-Marrakech | E 1-1 |
|                          | Mollar de cieza                                    | Spain                        | OWGB-Marrakech | E 1-1 |
|                          | Morejona                                           | Spain                        | OWGB-Marrakech | E 1-1 |
|                          | Morisca                                            | Spain                        | OWGB-Marrakech | E 1-1 |
|                          | Morrut                                             | Spain                        | OWGB-Marrakech | E 1-1 |
|                          | Negral de Savinan                                  | Spain                        | OWGB-Marrakech | E 1-1 |
|                          | Negrillo de La Carlota                             | Spain                        | WOGB-Cordoue   | E 1-1 |
|                          | Negrillo de Arjona                                 | Spain                        | OWGB-Marrakech | E 1-1 |
|                          | Negrillo de estepa                                 | Spain                        | OWGB-Marrakech | E 1-1 |
|                          | Negrillo redondo                                   | Spain                        | OWGB-Marrakech | E 1-1 |
|                          | Nevado Azul                                        | Spain                        | OWGB-Marrakech | E 1-1 |
|                          | Nevado Rizado                                      | Spain                        | OWGB-Marrakech | E 1-1 |
|                          | Ocal                                               | Spain                        | OWGB-Marrakech | E 1-1 |
|                          | Ojo de liebre                                      | Spain                        | OWGB-Marrakech | E 1-1 |
|                          | Olivo de Mancha real                               | Spain                        | OWGB-Marrakech | E 1-1 |
|                          | Olivo macho de Santestiban del puerto              | Spain                        | OWGB-Marrakech | E 1-1 |
|                          | Palamar                                            | Spain                        | OWGB-Marrakech | E 3-1 |
|                          | Patronet                                           | Spain                        | OWGB-Marrakech | E 3-1 |
|                          | Pavo                                               | Spain                        | OWGB-Marrakech | E 1-1 |
|                          | Picolimon de Grazalema                             | Spain                        | OWGB-Marrakech | E 1-1 |
|                          | Picual                                             | Spain                        | OWGB-Marrakech | E 1-1 |
|                          | Picual de hoja clara                               | Spain                        | OWGB-Marrakech | E 1-1 |
|                          | Picudo                                             | Spain                        | OWGB-Marrakech | E 1-1 |
|                          | Racimal                                            | Spain                        | OWGB-Marrakech | E 1-1 |
|                          | Rapasayo                                           | Spain                        | OWGB-Marrakech | E 1-1 |
|                          | Rechino                                            | Spain                        | OWGB-Marrakech | E 1-1 |
| Royal de casorla         | Spain                                              | OWGB-Marrakech               | E 1-1          |       |
| Sebatera                 | Spain                                              | OWGB-Marrakech               | E 2-1          |       |
| Sevillano de Jumilla     | Spain                                              | OWGB-Marrakech               | E 1-1          |       |

Table S1 (continued)

| Region of origin                                  | Cultivars               | Country         | Origin           | ptDNA |
|---------------------------------------------------|-------------------------|-----------------|------------------|-------|
| <b>Iberian Peninsula (West)</b>                   | Sevillenca              | Spain           | OWGB-Marrakech   | E 1-1 |
|                                                   | Tempranillo de lucena   | Spain           | OWGB-Marrakech   | E 1-1 |
|                                                   | Tempranillo de Yeste 1  | Spain           | OWGB-Marrakech   | E 1-1 |
|                                                   | Tempranillo de Yeste 2  | Spain           | OWGB-Marrakech   | E 1-1 |
|                                                   | Varudo                  | Spain           | OWGB-Marrakech   | E 1-1 |
|                                                   | Vera                    | Spain           | OWGB-Marrakech   | E 3-1 |
|                                                   | Verdal de Alhama        | Spain           | OWGB-Marrakech   | E 1-1 |
|                                                   | Verdala                 | Spain           | OWGB-Marrakech   | E 1-1 |
|                                                   | Verdial de Huévar       | Spain           | WOGB-Cordoue     | E 1-1 |
|                                                   | Verdial de Vélez-Málaga | Spain           | WOGB-Cordoue     | E 1-1 |
|                                                   | Verdiel                 | Spain           | OWGB-Marrakech   | E 1-1 |
|                                                   | Azeitonera Azeitira     | Portugal        | OWGB-Marrakech   | E 1-1 |
|                                                   | Blanqueta Branquita     | Portugal        | OWGB-Marrakech   | E 1-1 |
|                                                   | Carrasquenha            | Portugal        | OWGB-Marrakech   | E 1-1 |
|                                                   | Cobrancosa              | Portugal        | OWGB-Marrakech   | E 1-1 |
|                                                   | Cordovil de Serpa       | Portugal        | OWGB-Marrakech   | E 1-1 |
|                                                   | Galega vulgar           | Portugal        | OWGB-Marrakech   | E 1-2 |
|                                                   | Lentisca                | Portugal        | OWGB-Marrakech   | E 1-1 |
|                                                   | Madural                 | Portugal        | OWGB-Marrakech   | E 1-1 |
|                                                   | Mançanelha Algarvia     | Portugal        | OWGB-Marrakech   | E 1-1 |
|                                                   | Negrinha                | Portugal        | OWGB-Marrakech   | E 1-1 |
|                                                   | Redondal                | Portugal        | OWGB-Marrakech   | E 1-1 |
|                                                   | Santulhana              | Portugal        | OWGB-Marrakech   | E 1-1 |
| Verdal alentejna                                  | Portugal                | OWGB-Marrakech  | E 1-1            |       |
| Verdal transmontana                               | Portugal                | OWGB-Marrakech  | E 1-1            |       |
| <b>Continental France &amp; Corsica (Central)</b> | Aglandaou               | France          | OWGB-Marrakech   | E 1-1 |
|                                                   | Amellau                 | France          | OWGB-Marrakech   | E 1-1 |
|                                                   | Bouteillan              | France          | OWGB-Marrakech   | E 1-1 |
|                                                   | Cayon                   | France          | OWGB-Marrakech   | E 2-1 |
|                                                   | Grossane                | France          | OWGB-Marrakech   | E 1-1 |
|                                                   | Lucques                 | France          | OWGB-Marrakech   | E 1-1 |
|                                                   | Olivière                | France          | OWGB-Marrakech   | E 3-1 |
|                                                   | Picholine du Gard       | France          | OWGB-Marrakech   | E 2-1 |
|                                                   | Salonenque              | France          | OWGB-Marrakech   | E 1-1 |
|                                                   | Verdale de l'Hérault    | France          | OWGB-Marrakech   | E 1-1 |
|                                                   | Capnacce                | France, Corsica | Corte University | E 1-1 |
|                                                   | Sabina                  | France, Corsica | Corte University | E 2-4 |
|                                                   | Zinzala                 | France, Corsica | Corte University | E 2-2 |

Table S1 (continued)

| Region of origin                                   | Cultivars                      | Country        | Origin         | ptDNA |
|----------------------------------------------------|--------------------------------|----------------|----------------|-------|
| Italy (including Sardinia and Sicily)<br>(Central) | Abunara                        | Italy          | OWGB-Marrakech | E 1-2 |
|                                                    | Aitana                         | Italy          | OWGB-Marrakech | E 1-1 |
|                                                    | Albatro                        | Italy          | OWGB-Marrakech | E 1-1 |
|                                                    | Allora                         | Italy          | OWGB-Marrakech | E 1-1 |
|                                                    | Americano                      | Italy          | OWGB-Marrakech | E 1-1 |
|                                                    | Americano Itafir               | Italy          | OWGB-Marrakech | E 1-1 |
|                                                    | Angellina                      | Italy          | OWGB-Marrakech | E 1-1 |
|                                                    | Arancino                       | Italy          | OWGB-Marrakech | E 1-1 |
|                                                    | Ascolana tenera                | Italy          | OWGB-Marrakech | E 1-1 |
|                                                    | Bella Dispagna                 | Italy          | OWGB-Marrakech | E 1-2 |
|                                                    | Belvedere Maritima, local type | Italy          | Field collect  | E 1-1 |
|                                                    | Bianchera                      | Italy          | OWGB-Marrakech | E 1-1 |
|                                                    | Biancolilla                    | Italy          | OWGB-Marrakech | E 1-2 |
|                                                    | Bonifati, local type           | Italy          | Field collect  | E 2-1 |
|                                                    | Bosana                         | Italy          | CPFS           | E 1-1 |
|                                                    | Bottone Digallo                | Italy          | OWGB-Marrakech | E 1-1 |
|                                                    | Brandofino                     | Italy          | OWGB-Marrakech | E 1-1 |
|                                                    | Calatina                       | Italy          | OWGB-Marrakech | E 1-1 |
|                                                    | Caraputea                      | Italy          | OWGB-Marrakech | E 1-1 |
|                                                    | Caratina                       | Italy          | OWGB-Marrakech | E 1-1 |
|                                                    | Carboncella                    | Italy          | OWGB-Marrakech | E 1-1 |
|                                                    | Cariasina                      | Italy          | OWGB-Marrakech | E 1-1 |
|                                                    | Carolea 1                      | Italy          | OWGB-Marrakech | E 1-2 |
|                                                    | Carolea 2                      | Italy          | OWGB-Marrakech | E 1-2 |
|                                                    | Carsicana da mensa             | Italy          | OWGB-Marrakech | E 1-1 |
|                                                    | Cassanese                      | Italy          | OWGB-Marrakech | E 1-1 |
|                                                    | Castiglione                    | Italy          | OWGB-Marrakech | E 1-1 |
|                                                    | Castriciana                    | Italy          | OWGB-Marrakech | E 1-1 |
|                                                    | Castricianella                 | Italy          | OWGB-Marrakech | E 1-1 |
|                                                    | Cavalieri                      | Italy          | OWGB-Marrakech | E 1-1 |
|                                                    | Celeste, local type            | Italy          | Field collect  | E 1-1 |
|                                                    | Cerasuola                      | Italy          | OWGB-Marrakech | E 3-2 |
|                                                    | Ciciarillo                     | Italy          | OWGB-Marrakech | E 1-1 |
| Cilieginio                                         | Italy                          | OWGB-Marrakech | E 1-1          |       |
| Cima di Melfi                                      | Italy                          | OWGB-Marrakech | E 1-1          |       |
| Confetto                                           | Italy                          | OWGB-Marrakech | E 1-1          |       |

Table S1 (continued)

| <b>Region of origin</b>                                    | <b>Cultivars</b>        | <b>Country</b> | <b>Origin</b>  | <b>ptDNA</b> |
|------------------------------------------------------------|-------------------------|----------------|----------------|--------------|
| <b>Italy (including Sardinia and Sicily)<br/>(Central)</b> | Coratina 1              | Italy          | OWGB-Marrakech | E 1-1        |
|                                                            | Coratina 2              | Italy          | OWGB-Marrakech | E 1-1        |
|                                                            | Correggiolo di pallesse | Italy          | OWGB-Marrakech | E 1-1        |
|                                                            | Corsicana da olio       | Italy          | OWGB-Marrakech | E 1-1        |
|                                                            | Crastu                  | Italy          | OWGB-Marrakech | E 2-2        |
|                                                            | Cucca 1                 | Italy          | OWGB-Marrakech | E 1-1        |
|                                                            | Cucca 2                 | Italy          | OWGB-Marrakech | E 1-1        |
|                                                            | Cuoricino               | Italy          | OWGB-Marrakech | E 1-1        |
|                                                            | Dolce de Rossano        | Italy          | OWGB-Marrakech | E 1-1        |
|                                                            | Dritta di Muscufo       | Italy          | OWGB-Marrakech | E 1-1        |
|                                                            | Emilia                  | Italy          | OWGB-Marrakech | E 1-1        |
|                                                            | Fasolona                | Italy          | OWGB-Marrakech | E 1-1        |
|                                                            | Filare                  | Italy          | OWGB-Marrakech | E 1-1        |
|                                                            | Firezuelo               | Italy          | OWGB-Marrakech | E 1-1        |
|                                                            | Frantoio 1              | Italy          | OWGB-Marrakech | E 1-1        |
|                                                            | Frantoio 2              | Italy          | OWGB-Marrakech | E 1-1        |
|                                                            | Gentile di Chiete       | Italy          | OWGB-Marrakech | E 1-1        |
|                                                            | Giarfara                | Italy          | OWGB-Marrakech | E 1-1        |
|                                                            | Giarraffa               | Italy          | OWGB-Marrakech | E 1-2        |
|                                                            | Ginestrino              | Italy          | OWGB-Marrakech | E 1-1        |
|                                                            | Giogolino               | Italy          | OWGB-Marrakech | E 1-1        |
|                                                            | Gordale Sevillana       | Italy          | OWGB-Marrakech | E 1-2        |
|                                                            | Grappolo                | Italy          | OWGB-Marrakech | E 1-1        |
|                                                            | Gremigna Tonda          | Italy          | OWGB-Marrakech | E 1-1        |
|                                                            | Gremigno di Fuglia      | Italy          | OWGB-Marrakech | E 2-2        |
|                                                            | Gremignolo di Bogheri   | Italy          | OWGB-Marrakech | E 1-1        |
|                                                            | Grossa di spagna 1      | Italy          | OWGB-Marrakech | E 1-1        |
|                                                            | Grossa di spagna 2      | Italy          | OWGB-Marrakech | E 1-1        |
|                                                            | Grossolana              | Italy          | OWGB-Marrakech | E 1-1        |
|                                                            | Intosso                 | Italy          | OWGB-Marrakech | E 1-1        |
|                                                            | Itrana 1                | Italy          | OWGB-Marrakech | E 1-1        |
|                                                            | Itrana 2                | Italy          | OWGB-Marrakech | E 1-1        |
|                                                            | Larcianese              | Italy          | OWGB-Marrakech | E 1-1        |
| Lastrino                                                   | Italy                   | OWGB-Marrakech | E 1-1          |              |
| Lazzera reale                                              | Italy                   | OWGB-Marrakech | E 1-1          |              |
| Lazzero di prata                                           | Italy                   | OWGB-Marrakech | E 1-1          |              |
| Leccino                                                    | Italy                   | OWGB-Marrakech | E 1-1          |              |



Table S1 (continued)

| Region of origin                                   | Cultivars                       | Country        | Origin         | ptDNA |
|----------------------------------------------------|---------------------------------|----------------|----------------|-------|
| Italy (including Sardinia and Sicily)<br>(Central) | Leccio del Corno                | Italy          | OWGB-Marrakech | E 1-1 |
|                                                    | Leccio Maremmano                | Italy          | OWGB-Marrakech | E 1-1 |
|                                                    | Leccio Marmmuono                | Italy          | OWGB-Marrakech | E 1-1 |
|                                                    | Leccione                        | Italy          | OWGB-Marrakech | E 1-1 |
|                                                    | Lumario                         | Italy          | OWGB-Marrakech | E 1-1 |
|                                                    | Maiorca                         | Italy          | OWGB-Marrakech | E 1-1 |
|                                                    | Manna                           | Italy          | OWGB-Marrakech | E 1-1 |
|                                                    | Mantonica                       | Italy          | OWGB-Marrakech | E 1-1 |
|                                                    | Maremmano                       | Italy          | OWGB-Marrakech | E 1-1 |
|                                                    | Mariatica di Ferrandino         | Italy          | OWGB-Marrakech | E 1-1 |
|                                                    | Marzio                          | Italy          | OWGB-Marrakech | E 1-1 |
|                                                    | Maurino 1                       | Italy          | OWGB-Marrakech | E 1-1 |
|                                                    | Maurino 2                       | Italy          | OWGB-Marrakech | E 1-1 |
|                                                    | Mignolo                         | Italy          | OWGB-Marrakech | E 1-1 |
|                                                    | Mignolo cerretanolo Carretano   | Italy          | OWGB-Marrakech | E 1-1 |
|                                                    | Monte San' Angelo, local type   | Italy          | Field collect  | E 1-1 |
|                                                    | Moraiolo 1                      | Italy          | OWGB-Marrakech | E 1-1 |
|                                                    | Moraiolo 2                      | Italy          | OWGB-Marrakech | E 1-1 |
|                                                    | Morchiaio 1                     | Italy          | OWGB-Marrakech | E 1-1 |
|                                                    | Morchiaio 2                     | Italy          | OWGB-Marrakech | E 1-1 |
|                                                    | Morchione                       | Italy          | OWGB-Marrakech | E 1-1 |
|                                                    | Morcone                         | Italy          | OWGB-Marrakech | E 1-3 |
|                                                    | Morello a punta                 | Italy          | OWGB-Marrakech | E 1-1 |
|                                                    | Moresca                         | Italy          | OWGB-Marrakech | E 1-2 |
|                                                    | Mortellino                      | Italy          | OWGB-Marrakech | E 1-1 |
|                                                    | Nasitana FG                     | Italy          | OWGB-Marrakech | E 1-1 |
|                                                    | Nebra catanese                  | Italy          | OWGB-Marrakech | E 1-1 |
|                                                    | Nera di oliena / Terza piccolo* | Italy          | OWGB-Marrakech | E 1-1 |
|                                                    | Nera digonnos                   | Italy          | OWGB-Marrakech | E 1-1 |
|                                                    | Nerba                           | Italy          | OWGB-Marrakech | E 1-1 |
|                                                    | Nocellara del bellica 1         | Italy          | OWGB-Marrakech | E 1-1 |
|                                                    | Nocellara del bellica 2         | Italy          | OWGB-Marrakech | E 1-1 |
|                                                    | Nocellara Messinese 1           | Italy          | OWGB-Marrakech | E 1-1 |
| Nocellara Messinese 2                              | Italy                           | OWGB-Marrakech | E 1-1          |       |
| Nocellera etnia                                    | Italy                           | OWGB-Marrakech | E 1-1          |       |
| Nociara                                            | Italy                           | OWGB-Marrakech | E 1-1          |       |

Table S1 (continued)

| Region of origin                                   | Cultivars                         | Country        | Origin         | ptDNA |
|----------------------------------------------------|-----------------------------------|----------------|----------------|-------|
| Italy (including Sardinia and Sicily)<br>(Central) | Ogliarola Bradano                 | Italy          | OWGB-Marrakech | E 1-1 |
|                                                    | Ogliarola vulture                 | Italy          | OWGB-Marrakech | E 1-1 |
|                                                    | Oliddu                            | Italy          | OWGB-Marrakech | E 1-1 |
|                                                    | olivastra di Monticino            | Italy          | OWGB-Marrakech | E 1-1 |
|                                                    | Olivastra di popolonia            | Italy          | OWGB-Marrakech | E 1-1 |
|                                                    | Olivastra seggianese              | Italy          | OWGB-Marrakech | E 1-1 |
|                                                    | Olivo de casa vecchia             | Italy          | OWGB-Marrakech | E 1-1 |
|                                                    | olivo del mulino                  | Italy          | OWGB-Marrakech | E 1-1 |
|                                                    | Olivo di Mandanese 1              | Italy          | OWGB-Marrakech | E 1-1 |
|                                                    | Olivo di Mandanese 2              | Italy          | OWGB-Marrakech | E 1-1 |
|                                                    | Olivo di Sanlorenzo               | Italy          | OWGB-Marrakech | E 1-1 |
|                                                    | Ornellaia                         | Italy          | OWGB-Marrakech | E 1-1 |
|                                                    | Ottobratica                       | Italy          | OWGB-Marrakech | E 1-1 |
|                                                    | Palma                             | Italy          | OWGB-Marrakech | E 1-1 |
|                                                    | Passalunara                       | Italy          | OWGB-Marrakech | E 1-1 |
|                                                    | Paxheixedda / Tonda divillacidro* | Italy          | OWGB-Marrakech | E 1-1 |
|                                                    | Pendolino 1                       | Italy          | OWGB-Marrakech | E 1-1 |
|                                                    | Pendolino 2                       | Italy          | OWGB-Marrakech | E 1-1 |
|                                                    | Pexiatino                         | Italy          | OWGB-Marrakech | E 1-1 |
|                                                    | Piangente                         | Italy          | OWGB-Marrakech | E 1-1 |
|                                                    | Piricuddara                       | Italy          | OWGB-Marrakech | E 1-1 |
|                                                    | Pizz'è Carrognà                   | Italy          | OWGB-Marrakech | E 1-1 |
|                                                    | Pizzo di corvo                    | Italy          | OWGB-Marrakech | E 1-2 |
|                                                    | Ponteruelo                        | Italy          | OWGB-Marrakech | E 1-1 |
|                                                    | Puntino                           | Italy          | OWGB-Marrakech | E 1-1 |
|                                                    | Ravece                            | Italy          | OWGB-Marrakech | E 1-1 |
|                                                    | Razzaio                           | Italy          | OWGB-Marrakech | E 1-1 |
|                                                    | Razzo                             | Italy          | OWGB-Marrakech | E 1-1 |
|                                                    | Ropssellino Cerretano             | Italy          | OWGB-Marrakech | E 1-1 |
|                                                    | Rosino                            | Italy          | OWGB-Marrakech | E 1-1 |
|                                                    | Rosselino                         | Italy          | OWGB-Marrakech | E 1-1 |
|                                                    | Salicino                          | Italy          | OWGB-Marrakech | E 1-1 |
|                                                    | San Agostino 1                    | Italy          | OWGB-Marrakech | E 1-1 |
| San Agostino 2                                     | Italy                             | OWGB-Marrakech | E 1-1          |       |
| San Francesco 1                                    | Italy                             | OWGB-Marrakech | E 1-1          |       |
| San Francesco 2                                    | Italy                             | OWGB-Marrakech | E 1-1          |       |

Table S1 (continued)

| <b>Region of origin</b>                                    | <b>Cultivars</b>          | <b>Country</b>     | <b>Origin</b>  | <b>ptDNA</b>   |
|------------------------------------------------------------|---------------------------|--------------------|----------------|----------------|
| <b>Italy (including Sardinia and Sicily)<br/>(Central)</b> | San Lazzero               | Italy              | OWGB-Marrakech | E 1-1          |
|                                                            | San Marttinemga           | Italy              | OWGB-Marrakech | E 1-1          |
|                                                            | Santa Catarina 1          | Italy              | OWGB-Marrakech | E 1-2          |
|                                                            | Santa Catarina 2          | Italy              | OWGB-Marrakech | E 1-2          |
|                                                            | Sassarese                 | Italy              | OWGB-Marrakech | E 1-1          |
|                                                            | Semidana                  | Italy              | OWGB-Marrakech | E 1-1          |
|                                                            | Sinopolese                | Italy              | OWGB-Marrakech | E 1-1          |
|                                                            | Sivigliana da Mansa       | Italy              | OWGB-Marrakech | E 1-1          |
|                                                            | Sivigliana da Olio        | Italy              | OWGB-Marrakech | E 2-1          |
|                                                            | Terza grande              | Italy              | OWGB-Marrakech | E 1-1          |
|                                                            | Tonda di caliagri         | Italy              | OWGB-Marrakech | E 1-1          |
|                                                            | Tondello                  | Italy              | OWGB-Marrakech | E 1-1          |
|                                                            | Trillo                    | Italy              | OWGB-Marrakech | E 2-2          |
|                                                            | Uovo Dipiccione           | Italy              | OWGB-Marrakech | E 1-1          |
|                                                            | Vaddarica                 | Italy              | OWGB-Marrakech | E 1-1          |
|                                                            | <b>Slovenia (Central)</b> | Boise              | Slovenia       | OWGB-Marrakech |
| Buga                                                       |                           | Slovenia           | OWGB-Marrakech | E 1-1          |
| Crnica 1                                                   |                           | Slovenia           | OWGB-Marrakech | E 1-1          |
| Drobnica                                                   |                           | Slovenia           | OWGB-Marrakech | E 1-1          |
| Istrska belica                                             |                           | Slovenia           | OWGB-Marrakech | E 1-1          |
| Istrska belica pucer                                       |                           | Slovenia           | OWGB-Marrakech | E 1-1          |
| Samo                                                       |                           | Slovenia           | OWGB-Marrakech | E 1-1          |
| Storta                                                     |                           | Slovenia           | OWGB-Marrakech | E 1-1          |
| <b>Croatia (East)</b>                                      | Carbunoela                | Croatia            | OWGB-Marrakech | E 1-1          |
|                                                            | Crinca 2                  | Croatia            | OWGB-Marrakech | E 1-1          |
|                                                            | Drobnica                  | Croatia            | OWGB-Marrakech | E 1-1          |
|                                                            | Istarska crnica           | Croatia            | OWGB-Marrakech | E 1-1          |
|                                                            | Mezanica                  | Croatia            | OWGB-Marrakech | E 1-1          |
|                                                            | Oblica / Samo Iv*         | Croatia / Slovenia | OWGB-Marrakech | E 1-1          |
|                                                            | Oleaster                  | Croatia            | OWGB-Marrakech | E 1-1          |
|                                                            | Plominca                  | Croatia            | OWGB-Marrakech | E 1-1          |
| Pontoza                                                    | Croatia                   | OWGB-Marrakech     | E 1-1          |                |

Table S1 (continued)

| <b>Region of origin</b>         | <b>Cultivars</b>         | <b>Country</b> | <b>Origin</b>  | <b>ptDNA</b> |
|---------------------------------|--------------------------|----------------|----------------|--------------|
| <b>Croatia (East)</b>           | Simjaka                  | Croatia        | OWGB-Marrakech | E 1-1        |
|                                 | Sitnica                  | Croatia        | OWGB-Marrakech | E 1-1        |
|                                 | Uljarica                 | Croatia        | OWGB-Marrakech | E 1-1        |
|                                 | Velica Lastovka          | Croatia        | OWGB-Marrakech | E 1-1        |
| <b>Greece (East)</b>            | Amphisis                 | Greece         | OWGB-Marrakech | E 1-1        |
|                                 | Chalkidikis              | Greece         | OWGB-Marrakech | E 1-1        |
|                                 | Dafnelia                 | Greece         | OWGB-Marrakech | E 1-1        |
|                                 | Kalamon                  | Greece         | WOGB-Cordoue   | E 1-1        |
|                                 | Kalokerida               | Greece         | OWGB-Marrakech | E 3-1        |
|                                 | Karolia                  | Greece         | OWGB-Marrakech | E 1-1        |
|                                 | Karydolia                | Greece         | OWGB-Marrakech | E 1-1        |
|                                 | Kolybada                 | Greece         | OWGB-Marrakech | E 1-1        |
|                                 | Konservolia              | Greece         | WOGB-Cordoue   | E 1-1        |
|                                 | Koroneiki                | Greece         | OWGB-Marrakech | E 1-1        |
|                                 | Kothreiki                | Greece         | OWGB-Marrakech | E 1-1        |
|                                 | Koutsonrelia             | Greece         | OWGB-Marrakech | E 1-1        |
|                                 | Mastoidis                | Greece         | OWGB-Marrakech | E 1-1        |
|                                 | Mirtolia                 | Greece         | WOGB-Cordoue   | E 1-1        |
| <b>Turkey (East)</b>            | Ayvalik (Edremit Yaglik) | Turkey         | WOGB-Cordoue   | E 1-1        |
|                                 | Belluti                  | Turkey         | WOGB-Cordoue   | E 1-1        |
|                                 | Bodrum, local type 1     | Turkey         | Field collect  | E 1-1        |
|                                 | Bodrum, local type 2     | Turkey         | Field collect  | E 1-1        |
|                                 | Cakir (Valanolia)        | Turkey         | WOGB-Cordoue   | E 1-1        |
|                                 | Memecik                  | Turkey         | WOGB-Cordoue   | E 1-1        |
|                                 | Uslu                     | Turkey         | WOGB-Cordoue   | E 1-1        |
| <b>Egypt &amp; Sudan (East)</b> | Abou Monkar              | Egypt          | OWGB-Marrakech | E 1-1        |
|                                 | Aggezi Shami             | Egypt          | OWGB-Marrakech | E 1-1        |
|                                 | Aggizi Akse              | Egypt          | OWGB-Marrakech | E 1-1        |
|                                 | Aggizi Oshime            | Egypt          | OWGB-Marrakech | E 1-2        |
|                                 | Baid Lhmam               | Egypt          | OWGB-Marrakech | E 1-1        |

Table S1 (continued)

| Region of origin               | Cultivars               | Country                                        | Origin           | ptDNA          |       |
|--------------------------------|-------------------------|------------------------------------------------|------------------|----------------|-------|
| Egypt & Sudan (East)           | Balady                  | Egypt                                          | OWGB-Marrakech   | E 1-2          |       |
|                                | Bez Elanza              | Egypt                                          | OWGB-Marrakech   | E 1-1          |       |
|                                | Cairo 7                 | Egypt                                          | OWGB-Marrakech   | E 1-1          |       |
|                                | El Salam                | Egypt                                          | OWGB-Marrakech   | E 1-1          |       |
|                                | Ellewa                  | Egypt                                          | OWGB-Marrakech   | E 1-1          |       |
|                                | Hamed                   | Egypt                                          | OWGB-Marrakech   | E 1-2          |       |
|                                | Kosiem                  | Egypt                                          | OWGB-Marrakech   | E 1-1          |       |
|                                | Maraki                  | Egypt                                          | OWGB-Marrakech   | E 1-2          |       |
|                                | Meloky                  | Egypt                                          | OWGB-Marrakech   | E 1-2          |       |
|                                | Sebhawy                 | Egypt                                          | OWGB-Marrakech   | E 1-1          |       |
|                                | Toffahi                 | Egypt                                          | OWGB-Marrakech   | E 1-2          |       |
|                                | Wardan                  | Egypt                                          | OWGB-Marrakech   | E 1-1          |       |
|                                | Wateken                 | Egypt                                          | OWGB-Marrakech   | E 2-1          |       |
|                                | Mt Nuba (Erkowit)       | Sudan                                          | Field collect    | E 1-1          |       |
|                                | Levantine region (East) | Merhavia                                       | Irsael           | WOGB-Cordoue   | E 1-1 |
|                                |                         | Baladi Tawil / Baladi Ain / Jlot / Cailletier* | Lebanon / France | OWGB-Marrakech | E 1-1 |
| Kalbeltair                     |                         | Lebanon                                        | OWGB-Marrakech   | E 1-1          |       |
| Abadi Abou Ghabbra             |                         | Syria                                          | OWGB-Marrakech   | E 1-2          |       |
| Abadi Rassasi                  |                         | Syria                                          | OWGB-Marrakech   | E 1-1          |       |
| Abou Akfa                      |                         | Syria                                          | OWGB-Marrakech   | E 1-3          |       |
| Abou Anaked                    |                         | Syria                                          | OWGB-Marrakech   | E 1-3          |       |
| Ayrouni / Safrawi / Ksar Zeta* |                         | Syria                                          | OWGB-Marrakech   | E 1-1          |       |
| Bed Al Iguel / Baladi Roumani* |                         | Syria / Lebanon                                | OWGB-Marrakech   | E 1-1          |       |
| Bent Alkade                    |                         | Syria                                          | OWGB-Marrakech   | E 1-3          |       |
| Dan                            |                         | Syria                                          | OWGB-Marrakech   | E 1-1          |       |
| Delle                          |                         | Syria                                          | OWGB-Marrakech   | E 1-1          |       |
| Dimlali / Remmani / Bissani*   |                         | Syria / Lebanon                                | OWGB-Marrakech   | E 1-1          |       |
| Djabali Kini                   |                         | Syria                                          | OWGB-Marrakech   | E 1-2          |       |
| Djlot Tadmori / Shami Modabl*  |                         | Syria                                          | OWGB-Marrakech   | E 1-1          |       |
| Doebli / Mohazam Abou Satl*    |                         | Syria                                          | OWGB-Marrakech   | E 1-3          |       |
| Hembalassi                     |                         | Syria                                          | OWGB-Marrakech   | E 1-1          |       |
| Idleb 1                        |                         | Syria                                          | OWGB-Marrakech   | E 1-2          |       |
| Idleb 3                        |                         | Syria                                          | OWGB-Marrakech   | E 1-2          |       |

Table S1 (end)

| Region of origin        | Cultivars                                                       | Country                  | Origin         | ptDNA  |
|-------------------------|-----------------------------------------------------------------|--------------------------|----------------|--------|
| Levantine region (East) | Janude 2                                                        | Syria                    | OWGB-Marrakech | E 1-10 |
|                         | Kaesi / Saifi / Tefahi Tadmori*                                 | Syria                    | OWGB-Marrakech | E 1-1  |
|                         | Karamani                                                        | Syria                    | OWGB-Marrakech | E 1-3  |
|                         | Karme                                                           | Syria                    | OWGB-Marrakech | E 1-1  |
|                         | Khashabi                                                        | Syria                    | OWGB-Marrakech | E 1-1  |
|                         | Khuokhe                                                         | Syria                    | OWGB-Marrakech | E 1-2  |
|                         | Killin                                                          | Syria                    | OWGB-Marrakech | E 1-2  |
|                         | Maari                                                           | Syria                    | OWGB-Marrakech | E 1-1  |
|                         | Mahati                                                          | Syria                    | OWGB-Marrakech | E 1-3  |
|                         | Manakiri / Tebabs 1*                                            | Syria                    | OWGB-Marrakech | E 1-2  |
|                         | Mesyaf 2                                                        | Syria                    | OWGB-Marrakech | E 1-1  |
|                         | Mesyaf 1                                                        | Syria                    | OWGB-Marrakech | E 1-12 |
|                         | Mossabi                                                         | Syria                    | OWGB-Marrakech | E 1-2  |
|                         | Palmyre, local type                                             | Syria                    | Field collect  | E 1-2  |
|                         | Sorani / Baladi Kana / Roumani Kana / Analiontas 2 / Lefkara 1* | Syria / Lebanon / Cyprus | OWGB-Marrakech | E 1-1  |
|                         | Souri                                                           | Syria                    | OWGB-Marrakech | E 1-3  |
|                         | Stanbouli                                                       | Syria                    | OWGB-Marrakech | E 1-1  |
|                         | Sukkare                                                         | Syria                    | OWGB-Marrakech | E 1-1  |
|                         | Tarabelsi                                                       | Syria                    | OWGB-Marrakech | E 1-3  |
|                         | Tebabs 2 / Oum Kanane*                                          | Syria                    | OWGB-Marrakech | E 1-3  |
|                         | Tefahi                                                          | Syria                    | OWGB-Marrakech | E 1-3  |
|                         | Zael Almuhra                                                    | Syria                    | OWGB-Marrakech | E 1-1  |
|                         | Zaity                                                           | Syria                    | WOGB-Cordoue   | E 1-2  |
|                         | Alethrico                                                       | Cyprus                   | OWGB-Marrakech | E 1-1  |
|                         | Aredhiyoy 3                                                     | Cyprus                   | OWGB-Marrakech | E 1-1  |
|                         | Kato Dris / Athalassa / Evrihoy 2 / Lefkosia*                   | Cyprus                   | OWGB-Marrakech | E 1-1  |
|                         | Kato Dris 1 / Flasoy*                                           | Cyprus                   | OWGB-Marrakech | E 1-1  |
|                         | Kliroy 2                                                        | Cyprus                   | OWGB-Marrakech | E 1-1  |
|                         | Korakoy                                                         | Cyprus                   | OWGB-Marrakech | E 1-1  |
|                         | Lagoydhera                                                      | Cyprus                   | OWGB-Marrakech | E 1-1  |
|                         | Lithrodontas                                                    | Cyprus                   | OWGB-Marrakech | E 1-1  |
|                         | Menikon 1                                                       | Cyprus                   | OWGB-Marrakech | E 1-1  |

TABLE S2. List of wild olive populations (subsp. *europaea* and *laperrinei*) characterized in the present study. The locality of sampling, the number of individuals per location (N) and the GPS coordinates are given. Each Mediterranean population is *a priori* assigned to a geographic zone (i.e. West, Central or East).

| <b>Subspecies</b>                | <b>Locality</b>                | <b>Country</b> | <b>N</b> | <b>Lat.</b> | <b>Long.</b> |        |
|----------------------------------|--------------------------------|----------------|----------|-------------|--------------|--------|
| <b><i>europaea</i> (West)</b>    | Serra de Arabida               | Portugal       | 9        | 38.494      | -9.031       |        |
|                                  | Alcalá de los Gazules, Cadiz   | Spain          | 8        | 36.531      | -5.602       |        |
|                                  | Trassierra, Cordoba            | Spain          | 8        | 37.907      | -4.860       |        |
|                                  | Cabo de San Antonio            | Spain          | 9        | 38.802      | 0.196        |        |
|                                  | Peñíscola, Castelon            | Spain          | 8        | 40.342      | 0.382        |        |
|                                  | Cabrera, Mallorca              | Spain          | 8        | 39.145      | 2.938        |        |
|                                  | Cala Gran, Mallorca            | Spain          | 10       | 39.376      | 3.239        |        |
|                                  | S'Albufera des Grau, Minorca   | Spain          | 8        | 39.945      | 4.247        |        |
|                                  | Heracles Cave                  | Morocco        | 9        | 35.791      | -5.924       |        |
|                                  | Mokrisset – Ouazzane           | Morocco        | 8        | 35.036      | -5.478       |        |
|                                  | Bin El Ouidane                 | Morocco        | 8        | 32.110      | -6.469       |        |
|                                  | Sefrou-Zarhoun                 | Morocco        | 8        | 34.073      | -5.543       |        |
|                                  | Ameskroud                      | Morocco        | 9        | 30.543      | -9.288       |        |
|                                  | Asni                           | Morocco        | 8        | 31.244      | -8.001       |        |
|                                  | Tamanar                        | Morocco        | 5        | 31.111      | -9.686       |        |
| <b><i>europaea</i> (Central)</b> | Birkhadem – Gue de Constantine | Algeria        | 34       | 36.715      | 3.076        |        |
|                                  | Mount Belloua                  | Algeria        | 7        | 36.727      | 4.060        |        |
|                                  | Ichkeul                        | Tunisia        | 11       | 37.133      | 9.665        |        |
|                                  | Zaghouan – El Fahs             | Tunisia        | 6        | 36.380      | 10.040       |        |
|                                  | Mont Boron                     | France         | 8        | 43.700      | 7.297        |        |
|                                  | Ostriconi, Corsica             | France         | 8        | 42.648      | 9.065        |        |
|                                  | Roccapina, Corsica             | France         | 11       | 41.498      | 8.946        |        |
|                                  | Sassari, Sardinia              | Italy          | 6        | 40.703      | 8.591        |        |
|                                  | Dolianova, Sardinia            | Italy          | 10       | 39.400      | 9.211        |        |
|                                  | Menfi, Sicily                  | Italy          | 8        | 37.660      | 12.980       |        |
|                                  | Cittadella del Capo            | Italy          | 8        | 39.540      | 15.895       |        |
|                                  | Santa Tegla                    | Italy          | 8        | 41.777      | 16.152       |        |
|                                  | Wadi el Kuf                    | Libya          | 9        | 32.698      | 21.565       |        |
|                                  | <b><i>europaea</i> (East)</b>  | Mlijet         | Croatia  | 6           | 42.773       | 17.376 |
|                                  |                                | Lokrum         | Croatia  | 8           | 42.623       | 18.123 |
| Gialova                          |                                | Greece         | 13       | 36.964      | 21.711       |        |
| Kitries                          |                                | Greece         | 8        | 36.926      | 22.153       |        |

Table S2 (end)

| <b>Subspecies</b>                   | <b>Locality</b>          | <b>Country</b>   | <b>N</b> | <b>Lat.</b> | <b>Long.</b> |
|-------------------------------------|--------------------------|------------------|----------|-------------|--------------|
| <b><i>europaea</i> (East)</b>       | Sisses – Iraklio, Crete  | Greece           | 9        | 35.388      | 24.893       |
|                                     | Komos, Crete             | Greece           | 5        | 35.108      | 24.688       |
|                                     | Urla                     | Turkey           | 8        | 38.309      | 26.665       |
|                                     | Bodrum                   | Turkey           | 9        | 37.045      | 27.235       |
|                                     | Oludeniz                 | Turkey           | 6        | 36.561      | 29.106       |
|                                     | Stavrovouni              | Cyprus           | 8        | 34.886      | 33.438       |
|                                     | Antakya                  | Turkey           | 13       | 35.968      | 36.129       |
|                                     | Rajo                     | Syria            | 8        | 36.693      | 36.641       |
|                                     | Fakrou                   | Syria            | 8        | 35.307      | 36.302       |
|                                     | Al Ascharinah            | Syria            | 6        | 35.268      | 36.319       |
|                                     | Haram                    | Syria            | 8        | 36.217      | 36.562       |
|                                     | Tel Arruman              | Jordan           | 2        | 32.183      | 35.821       |
|                                     | Mount Carmel             | Israel           | 8        | 32.732      | 35.063       |
|                                     | <b><i>laperrinei</i></b> | Einzebib, Hoggar | Algeria  | 22          | 22.800       |
| Intounine, Hoggar                   |                          | Algeria          | 6        | 22.788      | 5.693        |
| Tahassa, Hoggar                     |                          | Algeria          | 14       | 22.802      | 5.678        |
| Hadriane, Hoggar                    |                          | Algeria          | 23       | 22.783      | 5.583        |
| Tin-Hamor, Hoggar                   |                          | Algeria          | 4        | 22.835      | 5.635        |
| Akerakar « chaâba », Hoggar         |                          | Algeria          | 6        | 23.047      | 5.727        |
| Ilenanene, Hoggar                   |                          | Algeria          | 6        | 22.925      | 5.530        |
| Oulet (Isekrâm), Hoggar             |                          | Algeria          | 10       | 22.907      | 5.572        |
| Tin-Aleo/Tonget, Hoggar             |                          | Algeria          | 12       | 23.098      | 6.012        |
| Adjelella, Hoggar                   |                          | Algeria          | 14       | 22.632      | 5.607        |
| Taessa, Hoggar                      |                          | Algeria          | 10       | 23.072      | 5.513        |
| Tizoûadj, Hoggar                    |                          | Algeria          | 6        | 23.244      | 5.673        |
| Vallée des Cyprès, Tassili n'Ajjer  |                          | Algeria          | 45       | 24.605      | 9.603        |
| Faille du Tamgak « Ouest », Tamgak  |                          | Niger            | 20       | 19.054      | 8.598        |
| Faille du Tamgak « Centre », Tamgak |                          | Niger            | 16       | 19.069      | 8.649        |
| Faille du Tamgak « Sud », Tamgak    |                          | Niger            | 8        | 18.994      | 8.662        |
| Bagzane « Nord », Bagzane           |                          | Niger            | 38       | 17.832      | 8.750        |
| Bagzane « Centre », Bagzane         |                          | Niger            | 9        | 17.736      | 8.747        |
| Egalah, Bagzane                     |                          | Niger            | 1        | 18.175      | 8.699        |



TABLE S3. Profiles of the 67 plastid DNA haplotypes revealed in the present study using 45 polymorphic loci. Alleles of each locus are coded for the reduced-median network analysis (Figure 1). Stretch size of the repeated motif is given for each microsatellite (36 loci), while a binary code (0/1) has been defined for seven indels and two single nucleotide polymorphisms. This coding was verified by sequencing alleles of a few haplotypes (for more details see Besnard *et al.* 2011). The 47 Mediterranean haplotypes were recently reported by Besnard *et al.* (2013) based on the characterization of 1797 Mediterranean accessions.

| Subspecies      | Haplotype | Plastid DNA Loci |           |    |    |    |    |    |    |    |    |    |    |      |      |      |      |    |    |    |    |    |    |    |    |    |    |    |    |    |    |      |      |    |    |    |    |    |    |    |      |    |    |   |   |   |
|-----------------|-----------|------------------|-----------|----|----|----|----|----|----|----|----|----|----|------|------|------|------|----|----|----|----|----|----|----|----|----|----|----|----|----|----|------|------|----|----|----|----|----|----|----|------|----|----|---|---|---|
|                 |           | CAPs-Xapi        | CAPs-EonH | 27 | 27 | 45 | 1  | 1  | 15 | 2  | 48 | 24 | 52 | 57-1 | 57-1 | 54-1 | 54-1 | 39 | 38 | 46 | 23 | 9  | 51 | 22 | 59 | 25 | 28 | 53 | 33 | 21 | 19 | 11-1 | 11-1 | 42 | 41 | 49 | 56 | 58 | 50 | 29 | 10-1 | 61 |    |   |   |   |
| <i>europaea</i> | E1.1      | 1                | 0         | 8  | 10 | 10 | 12 | 10 | 15 | 10 | 21 | 15 | 11 | 1    | 1    | 15   | 1    | 9  | 13 | 10 | 11 | 10 | 21 | 18 | 13 | 7  | 13 | 12 | 9  | 11 | 10 | 33   | 0    | 12 | 12 | 11 | 11 | 10 | 10 | 16 | 11   | 21 | 21 | 1 | 0 | 1 |
|                 | E1.2      | 0                | 1         | 8  | 10 | 10 | 12 | 10 | 15 | 10 | 21 | 15 | 11 | 1    | 1    | 15   | 1    | 9  | 13 | 10 | 11 | 10 | 21 | 17 | 13 | 7  | 13 | 12 | 9  | 11 | 10 | 34   | 0    | 12 | 12 | 11 | 11 | 10 | 10 | 16 | 11   | 21 | 21 | 1 | 0 | 1 |
|                 | E1.3      | 1                | 1         | 8  | 10 | 10 | 12 | 10 | 15 | 10 | 21 | 15 | 11 | 1    | 1    | 15   | 1    | 9  | 13 | 10 | 11 | 10 | 21 | 17 | 13 | 7  | 13 | 12 | 9  | 11 | 10 | 33   | 0    | 12 | 12 | 11 | 11 | 10 | 10 | 16 | 11   | 21 | 21 | 1 | 0 | 1 |
|                 | E1.4      | 1                | 1         | 8  | 10 | 10 | 12 | 10 | 15 | 10 | 21 | 15 | 11 | 1    | 1    | 15   | 1    | 9  | 13 | 10 | 11 | 10 | 21 | 18 | 13 | 7  | 13 | 12 | 9  | 11 | 10 | 33   | 0    | 12 | 12 | 11 | 11 | 10 | 10 | 16 | 11   | 21 | 21 | 1 | 0 | 1 |
|                 | E1.5      | 1                | 1         | 8  | 10 | 10 | 12 | 10 | 15 | 10 | 21 | 15 | 11 | 1    | 1    | 15   | 1    | 9  | 13 | 10 | 11 | 10 | 21 | 17 | 13 | 7  | 13 | 12 | 9  | 11 | 10 | 34   | 0    | 12 | 12 | 11 | 11 | 10 | 10 | 16 | 11   | 21 | 21 | 1 | 0 | 1 |
|                 | E1.6      | 1                | 1         | 8  | 10 | 10 | 12 | 10 | 15 | 10 | 21 | 15 | 11 | 1    | 1    | 15   | 1    | 9  | 13 | 10 | 11 | 10 | 21 | 18 | 13 | 7  | 13 | 12 | 9  | 11 | 10 | 33   | 0    | 12 | 12 | 11 | 11 | 10 | 10 | 16 | 11   | 21 | 21 | 1 | 0 | 1 |
|                 | E1.7      | 1                | 1         | 8  | 10 | 10 | 12 | 10 | 15 | 10 | 21 | 15 | 11 | 1    | 1    | 15   | 1    | 9  | 13 | 10 | 11 | 10 | 21 | 18 | 13 | 7  | 13 | 12 | 9  | 11 | 11 | 33   | 0    | 12 | 12 | 11 | 11 | 10 | 10 | 16 | 11   | 21 | 21 | 1 | 0 | 1 |
|                 | E1.8      | 1                | 1         | 8  | 10 | 10 | 12 | 10 | 15 | 10 | 21 | 15 | 11 | 1    | 1    | 15   | 1    | 10 | 13 | 10 | 11 | 10 | 21 | 18 | 13 | 7  | 13 | 12 | 9  | 11 | 10 | 33   | 0    | 12 | 12 | 11 | 11 | 10 | 10 | 16 | 11   | 21 | 21 | 1 | 0 | 1 |
|                 | E1.9      | 1                | 1         | 8  | 10 | 10 | 12 | 10 | 15 | 10 | 21 | 15 | 11 | 1    | 1    | 14   | 1    | 9  | 13 | 10 | 11 | 10 | 21 | 18 | 13 | 7  | 13 | 12 | 9  | 11 | 10 | 33   | 0    | 12 | 12 | 11 | 11 | 10 | 10 | 16 | 11   | 21 | 21 | 1 | 0 | 1 |
|                 | E1.10     | 1                | 1         | 8  | 10 | 10 | 12 | 10 | 15 | 10 | 21 | 15 | 11 | 1    | 1    | 15   | 1    | 9  | 12 | 10 | 11 | 10 | 21 | 18 | 13 | 7  | 13 | 12 | 9  | 11 | 10 | 33   | 0    | 12 | 12 | 11 | 11 | 10 | 10 | 16 | 11   | 21 | 21 | 1 | 0 | 1 |
|                 | E1.11     | 1                | 1         | 8  | 10 | 10 | 12 | 10 | 15 | 10 | 21 | 15 | 11 | 1    | 1    | 16   | 1    | 9  | 12 | 10 | 11 | 10 | 21 | 18 | 13 | 7  | 13 | 12 | 9  | 11 | 10 | 33   | 0    | 12 | 12 | 11 | 11 | 10 | 10 | 16 | 11   | 21 | 21 | 1 | 0 | 1 |
|                 | E1.12     | 1                | 0         | 8  | 10 | 10 | 13 | 10 | 15 | 10 | 21 | 15 | 11 | 1    | 1    | 15   | 1    | 9  | 13 | 10 | 11 | 10 | 21 | 18 | 13 | 7  | 13 | 12 | 9  | 11 | 10 | 33   | 0    | 12 | 12 | 11 | 11 | 10 | 10 | 16 | 11   | 21 | 21 | 1 | 0 | 1 |
|                 | E1.13     | 0                | 1         | 8  | 10 | 10 | 12 | 10 | 15 | 11 | 21 | 15 | 11 | 1    | 1    | 15   | 1    | 9  | 13 | 10 | 11 | 10 | 21 | 18 | 13 | 7  | 13 | 12 | 9  | 11 | 10 | 33   | 0    | 12 | 12 | 11 | 11 | 10 | 10 | 16 | 11   | 21 | 21 | 1 | 0 | 1 |
|                 | E1.14     | 0                | 1         | 8  | 10 | 10 | 12 | 10 | 15 | 11 | 21 | 15 | 11 | 1    | 1    | 14   | 1    | 9  | 13 | 10 | 11 | 10 | 21 | 18 | 13 | 7  | 13 | 12 | 9  | 11 | 10 | 33   | 0    | 12 | 12 | 11 | 11 | 10 | 10 | 16 | 11   | 21 | 21 | 1 | 0 | 1 |
|                 | E1.15     | 1                | 1         | 8  | 10 | 10 | 12 | 10 | 15 | 10 | 21 | 15 | 11 | 1    | 1    | 15   | 1    | 9  | 13 | 10 | 11 | 10 | 21 | 18 | 13 | 7  | 13 | 12 | 9  | 11 | 10 | 33   | 0    | 12 | 12 | 11 | 11 | 10 | 10 | 16 | 11   | 21 | 21 | 1 | 0 | 1 |
|                 | E1.16     | 1                | 1         | 8  | 10 | 10 | 12 | 10 | 15 | 10 | 21 | 15 | 11 | 1    | 1    | 15   | 1    | 9  | 13 | 10 | 11 | 10 | 21 | 18 | 13 | 7  | 13 | 12 | 9  | 11 | 10 | 33   | 0    | 12 | 12 | 11 | 11 | 10 | 10 | 16 | 11   | 20 | 21 | 1 | 0 | 1 |
|                 | E1.17     | 1                | 1         | 8  | 10 | 10 | 12 | 10 | 15 | 10 | 21 | 15 | 11 | 1    | 1    | 15   | 1    | 9  | 13 | 10 | 11 | 10 | 21 | 19 | 13 | 7  | 13 | 12 | 9  | 11 | 10 | 33   | 0    | 12 | 12 | 11 | 11 | 10 | 10 | 16 | 11   | 20 | 21 | 1 | 0 | 1 |
|                 | E1.18     | 1                | 1         | 8  | 10 | 10 | 12 | 10 | 15 | 11 | 21 | 15 | 11 | 1    | 1    | 15   | 1    | 9  | 13 | 10 | 11 | 10 | 21 | 19 | 13 | 7  | 13 | 12 | 9  | 11 | 10 | 33   | 0    | 12 | 12 | 11 | 11 | 10 | 10 | 16 | 11   | 21 | 21 | 1 | 0 | 1 |
|                 | E1.19     | 1                | 1         | 8  | 10 | 10 | 12 | 10 | 15 | 11 | 21 | 15 | 11 | 1    | 1    | 15   | 1    | 9  | 13 | 10 | 11 | 10 | 21 | 17 | 13 | 7  | 13 | 12 | 9  | 11 | 10 | 33   | 0    | 12 | 12 | 11 | 11 | 10 | 10 | 16 | 11   | 21 | 21 | 1 | 0 | 1 |
|                 | E1.20     | 1                | 1         | 8  | 10 | 10 | 12 | 10 | 15 | 10 | 21 | 15 | 11 | 1    | 1    | 15   | 1    | 9  | 13 | 10 | 11 | 10 | 21 | 17 | 13 | 7  | 13 | 12 | 9  | 11 | 10 | 33   | 0    | 12 | 12 | 11 | 11 | 10 | 10 | 16 | 11   | 21 | 21 | 1 | 0 | 1 |
|                 | E1.21     | 1                | 1         | 8  | 10 | 10 | 12 | 10 | 15 | 10 | 21 | 15 | 11 | 1    | 1    | 16   | 1    | 9  | 13 | 10 | 11 | 10 | 21 | 18 | 13 | 7  | 13 | 12 | 9  | 11 | 10 | 33   | 0    | 12 | 12 | 11 | 11 | 10 | 10 | 16 | 11   | 21 | 21 | 1 | 0 | 1 |
|                 | E1.22     | 1                | 1         | 8  | 10 | 10 | 12 | 10 | 15 | 10 | 21 | 15 | 11 | 1    | 1    | 15   | 1    | 9  | 13 | 10 | 11 | 10 | 21 | 17 | 13 | 7  | 13 | 12 | 9  | 12 | 10 | 34   | 0    | 12 | 12 | 11 | 11 | 10 | 10 | 16 | 11   | 21 | 21 | 1 | 0 | 1 |
|                 | E1.23     | 1                | 1         | 8  | 10 | 10 | 12 | 10 | 16 | 10 | 21 | 15 | 11 | 1    | 1    | 15   | 1    | 9  | 13 | 10 | 11 | 10 | 21 | 17 | 13 | 7  | 13 | 12 | 9  | 11 | 10 | 33   | 0    | 12 | 12 | 11 | 11 | 10 | 10 | 16 | 11   | 21 | 21 | 1 | 0 | 1 |
|                 | E1.24     | 1                | 1         | 8  | 10 | 10 | 12 | 10 | 15 | 10 | 21 | 15 | 11 | 1    | 1    | 15   | 1    | 9  | 13 | 10 | 11 | 10 | 21 | 14 | 13 | 7  | 13 | 12 | 9  | 11 | 10 | 33   | 0    | 12 | 12 | 11 | 11 | 10 | 10 | 16 | 11   | 21 | 21 | 1 | 0 | 1 |
|                 | E1.25     | 1                | 1         | 8  | 10 | 10 | 12 | 9  | 15 | 10 | 21 | 15 | 11 | 1    | 1    | 15   | 1    | 10 | 13 | 10 | 11 | 10 | 21 | 18 | 13 | 7  | 13 | 12 | 9  | 11 | 10 | 33   | 0    | 12 | 12 | 11 | 11 | 10 | 10 | 16 | 11   | 21 | 21 | 1 | 0 | 1 |
|                 | E1.26     | 1                | 1         | 8  | 10 | 10 | 12 | 10 | 15 | 10 | 21 | 15 | 11 | 1    | 1    | 15   | 1    | 10 | 13 | 10 | 11 | 10 | 21 | 19 | 13 | 7  | 13 | 12 | 9  | 11 | 10 | 33   | 0    | 12 | 12 | 11 | 11 | 10 | 10 | 16 | 11   | 21 | 21 | 1 | 0 | 1 |
|                 | E1.27     | 0                | 1         | 8  | 10 | 10 | 12 | 10 | 16 | 10 | 21 | 15 | 11 | 1    | 1    | 15   | 1    | 9  | 13 | 10 | 11 | 10 | 21 | 18 | 13 | 7  | 13 | 12 | 9  | 11 | 10 | 33   | 0    | 12 | 12 | 11 | 11 | 10 | 10 | 16 | 11   | 21 | 21 | 1 | 0 | 1 |
| E2.1            | 1         | 1                | 8         | 10 | 10 | 11 | 9  | 16 | 11 | 21 | 16 | 11 | 1  | 0    | 13   | 0    | 9    | 13 | 11 | 10 | 11 | 20 | 11 | 13 | 7  | 13 | 12 | 9  | 11 | 10 | 32 | 1    | 14   | 12 | 12 | 10 | 10 | 15 | 11 | 21 | 21   | 0  | 0  | 1 |   |   |
| E2.2            | 0         | 1                | 8         | 10 | 10 | 11 | 9  | 16 | 11 | 21 | 16 | 11 | 1  | 0    | 13   | 0    | 9    | 13 | 11 | 10 | 11 | 20 | 11 | 13 | 7  | 13 | 12 | 9  | 11 | 10 | 33 | 1    | 14   | 12 | 12 | 10 | 10 | 15 | 11 | 21 | 21   | 0  | 0  | 1 |   |   |
| E2.3            | 1         | 1                | 8         | 10 | 10 | 11 | 9  | 16 | 11 | 21 | 16 | 11 | 1  | 0    | 13   | 0    | 9    | 13 | 11 | 10 | 11 | 20 | 11 | 13 | 7  | 13 | 12 | 9  | 11 | 10 | 32 | 1    | 14   | 12 | 12 | 10 | 10 | 15 | 11 | 21 | 21   | 0  | 0  | 1 |   |   |
| E2.4            | 0         | 1                | 8         | 10 | 10 | 11 | 9  | 16 | 11 | 21 | 16 | 11 | 1  | 0    | 13   | 0    | 9    | 13 | 11 | 10 | 11 | 20 | 11 | 13 | 7  | 13 | 12 | 9  | 11 | 10 | 32 | 1    | 14   | 12 | 12 | 10 | 10 | 15 | 11 | 21 | 21   | 0  | 0  | 1 |   |   |
| E2.5            | 1         | 1                | 8         | 10 | 10 | 11 | 9  | 16 | 10 | 21 | 16 | 11 | 1  | 0    | 13   | 0    | 9    | 13 | 11 | 10 | 11 | 20 | 11 | 13 | 7  | 13 | 12 | 9  | 11 | 10 | 32 | 1    | 14   | 12 | 12 | 10 | 10 | 15 | 11 | 21 | 21   | 0  | 0  | 1 |   |   |
| E2.6            | 1         | 1                | 8         | 10 | 10 | 11 | 9  | 16 | 10 | 21 | 16 | 11 | 1  | 0    | 13   | 0    | 9    | 13 | 11 | 9  | 11 | 20 | 11 | 13 | 7  | 13 | 12 | 9  | 11 | 10 | 32 | 1    | 14   | 12 | 12 | 10 | 10 | 15 | 11 | 21 | 21   | 0  | 0  | 1 |   |   |
| E2.7            | 1         | 1                | 8         | 10 | 10 | 11 | 9  | 16 | 11 | 21 | 16 | 11 | 1  | 0    | 13   | 0    | 9    | 13 | 12 | 10 | 11 | 20 | 11 | 13 | 7  | 13 | 12 | 9  | 11 | 10 | 32 | 1    | 14   | 12 | 12 | 10 | 10 | 15 | 11 | 21 | 21   | 0  | 0  | 1 |   |   |
| E2.8            | 1         | 1                | 9         | 10 | 10 | 11 | 9  | 16 | 11 | 21 | 16 | 11 | 1  | 0    | 13   | 0    | 9    | 13 | 11 | 10 | 11 | 20 | 11 | 13 | 7  | 13 | 12 | 9  | 11 | 10 | 32 | 1    | 14   | 12 | 12 | 10 | 10 | 15 | 11 | 22 | 21   | 0  | 0  | 1 |   |   |
| E2.9            | 1         | 1                | 9         | 10 | 10 | 11 | 9  | 16 | 11 | 21 | 16 | 11 | 1  | 0    | 13   | 0    | 9    | 13 | 11 | 10 | 11 | 20 | 11 | 13 | 7  | 13 | 12 | 9  | 11 | 10 | 32 | 1    | 14   | 12 | 12 | 11 | 10 | 15 | 11 | 22 | 21   | 0  | 0  | 1 |   |   |
| E2.10           | 0         | 1                | 8         | 10 | 10 | 11 | 9  | 16 | 11 | 21 | 16 | 11 | 1  | 0    | 13   | 0    | 9    | 13 | 11 | 10 | 11 | 20 | 11 | 14 | 7  | 13 | 12 | 9  | 11 | 10 | 33 | 1    | 14   | 12 | 12 | 10 | 10 | 15 | 11 | 21 | 21   | 0  |    |   |   |   |

FIG. S1. Bayesian inference of population structure (based on ten nuclear SSRs) in the Mediterranean olive (including both cultivated and wild accessions; 860 individuals), for  $K = 2, 3$  and 5 clusters. A model-based clustering method implemented in STRUCTURE v.2.3.4 (Pritchard *et al.* 2000) was used.  $H'$  represents similarity coefficient between ten runs for each  $K$ , while  $\Delta K$  represents the ad-hoc measure of Evanno *et al.* (2005). The graph on the right bottom gives  $\Delta K$  plotted against  $K$ . According to  $\Delta K$  and  $H'$ , the most probable genetic structure model is  $K = 2$  clusters ( $\Delta K = 3536.7$  and  $H' = 0.999$ ), for which most wild accessions from the western and central Mediterranean basin are distinguished from cultivars and eastern wild accessions; at  $K = 3$ , the western oleaster cluster remains but eastern cultivated olives and oleasters are distinguished from western and central Mediterranean cultivars; and at  $K = 5$ , a trend for the occurrence of a cultivar cluster in each predefined geographic zone (*i.e.* West, Central and East Mediterranean; Table S2) is revealed, as recently reported by Haouane *et al.* (2011). Central Mediterranean cultivars revealed the highest admixture level among the three gene pools as supported by the admixed inferred ancestry origins of most of its genotypes, whereas western and eastern cultivars revealed to be highly assigned to their respective gene pools (see also Haouane *et al.* 2011).

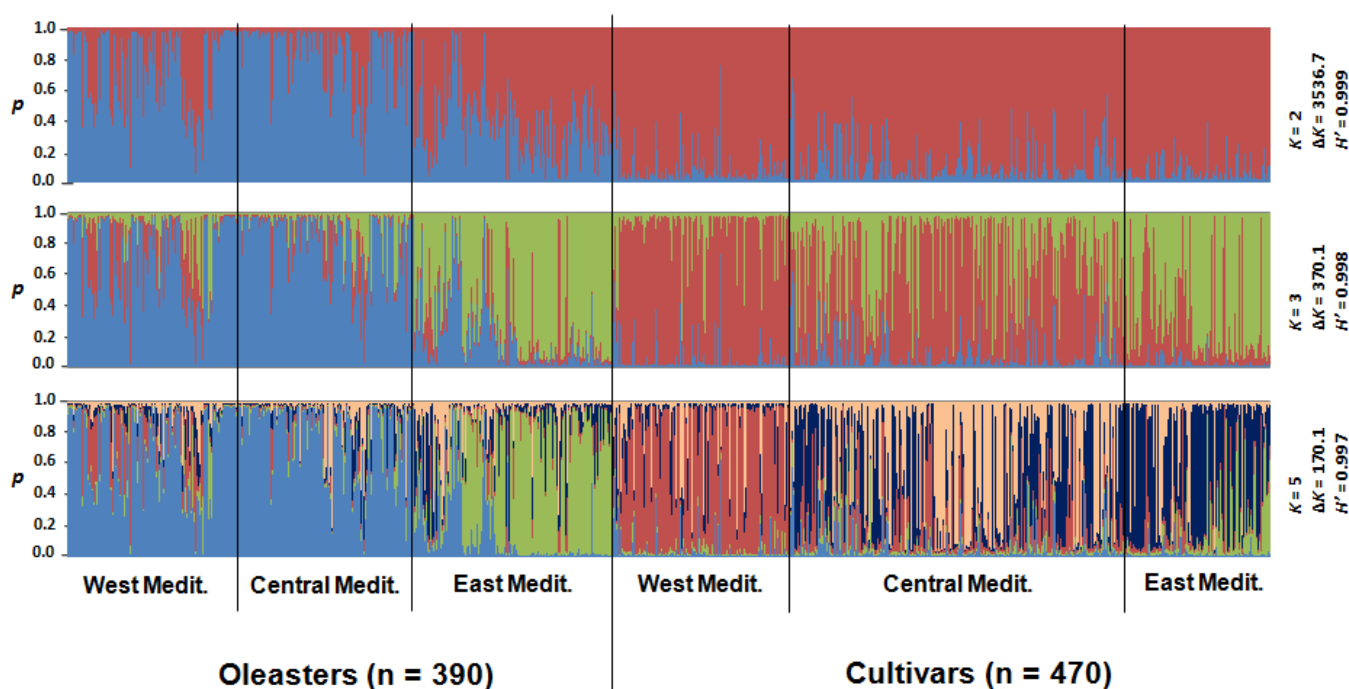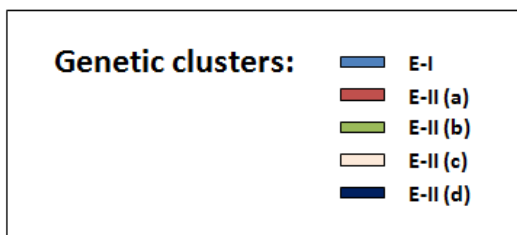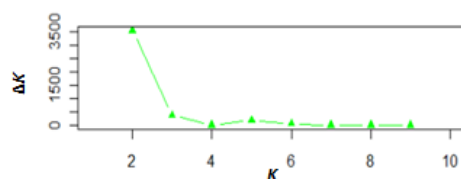

FIG. S2. Bayesian inference of population structure (based on ten nuclear SSRs) in the **a**) oleasters (390 individuals) and **b**) cultivated olives (470 individuals). A model-based clustering method implemented in STRUCTURE v.2.3.4 (Pritchard *et al.* 2000) was used.  $H'$  represents similarity coefficient between ten runs for each  $K$ , while  $\Delta K$  represents the ad-hoc measure of Evanno *et al.* (2005). The graph on the right bottom gives  $\Delta K$  plotted against  $K$ . According to  $\Delta K$  and  $H'$ , the most probable genetic structure model is  $K = 2$  clusters for oleasters, and  $K = 3$  for cultivars. In oleasters (a), eastern accessions are mostly assigned to cluster E-II while western and central accessions are mainly assigned to cluster E-I (as shown in Figure 2, for  $K = 3$  or 5). In cultivars (b), a trend for the occurrence of a cultivar cluster in each predefined geographic zone (*i.e.* West, Central and East Mediterranean; Table S2) is revealed (as shown in Figure S1). Central Mediterranean cultivars revealed the highest admixture level among the three gene pools as supported by the admixed inferred ancestry origins of most of its genotypes, whereas western and eastern cultivars revealed to be highly assigned to their respective gene pools (see also Haouane *et al.* 2011; Belaj *et al.* 2012; Díez *et al.* 2012).

**a.**

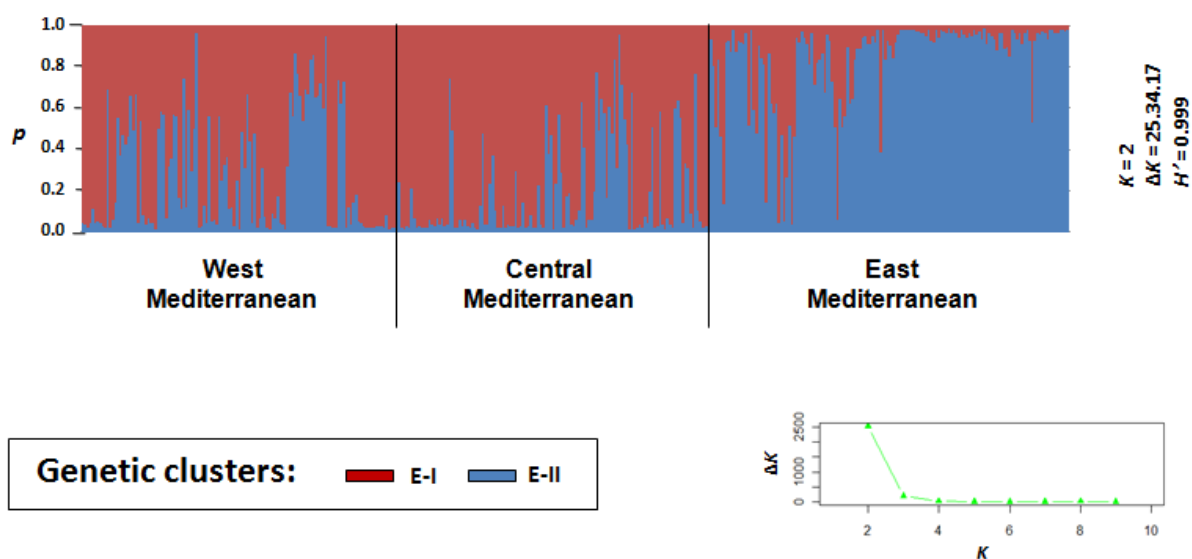

**b.**

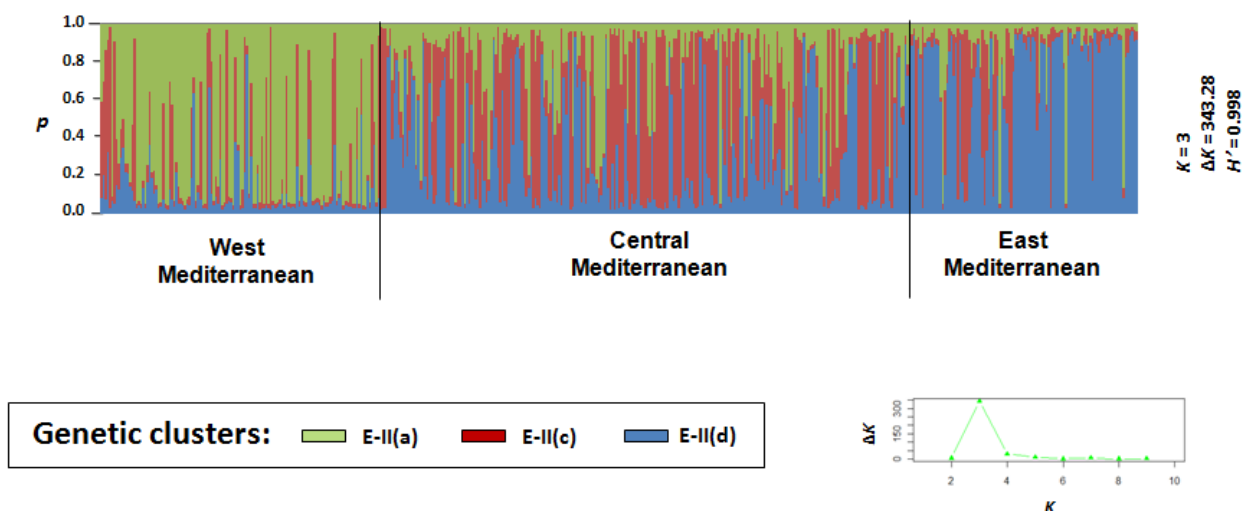

FIG. S3. Bayesian inference of population structure (based on ten nuclear SSRs) for two pairwise comparisons: **a)** Laperrine’s olive-Oleasters (660 individuals) and **b)** Laperrine’s olive-Cultivars (740 individuals). A model-based clustering method implemented in STRUCTURE v.2.3.4 (Pritchard *et al.* 2000) was used. Each vertical bar represents an individual. The membership coefficients of assignment ( $p$ ) of each individual to the different clusters averaged over ten iterations is shown for  $K = 3$  or 4 clusters.  $H'$  represents similarity coefficient between ten runs for each  $K$  and  $\Delta K$  is the ad-hoc measure of Evanno *et al.* (2005). The graph on the right bottom gives  $\Delta K$  plotted against  $K$ . The taxa (i.e. Laperrine’s olive, oleasters, cultivars) are indicated, and three predefined regions are recognised for both oleasters and cultivars (Tables S1 and S2). “West Mediterranean” corresponds to accessions from Morocco and the Iberian Peninsula, “Central Mediterranean” corresponds to accessions from Algeria to Libya and France to Continental Italy, and “East Mediterranean” corresponds to accessions from Croatia to the Levant. Most accessions of subspp. *laperrinei* and *europaea* are assigned to clusters L and E, respectively. The putative admixed individuals ( $p > 0.1$ ) are indicated by arrows.

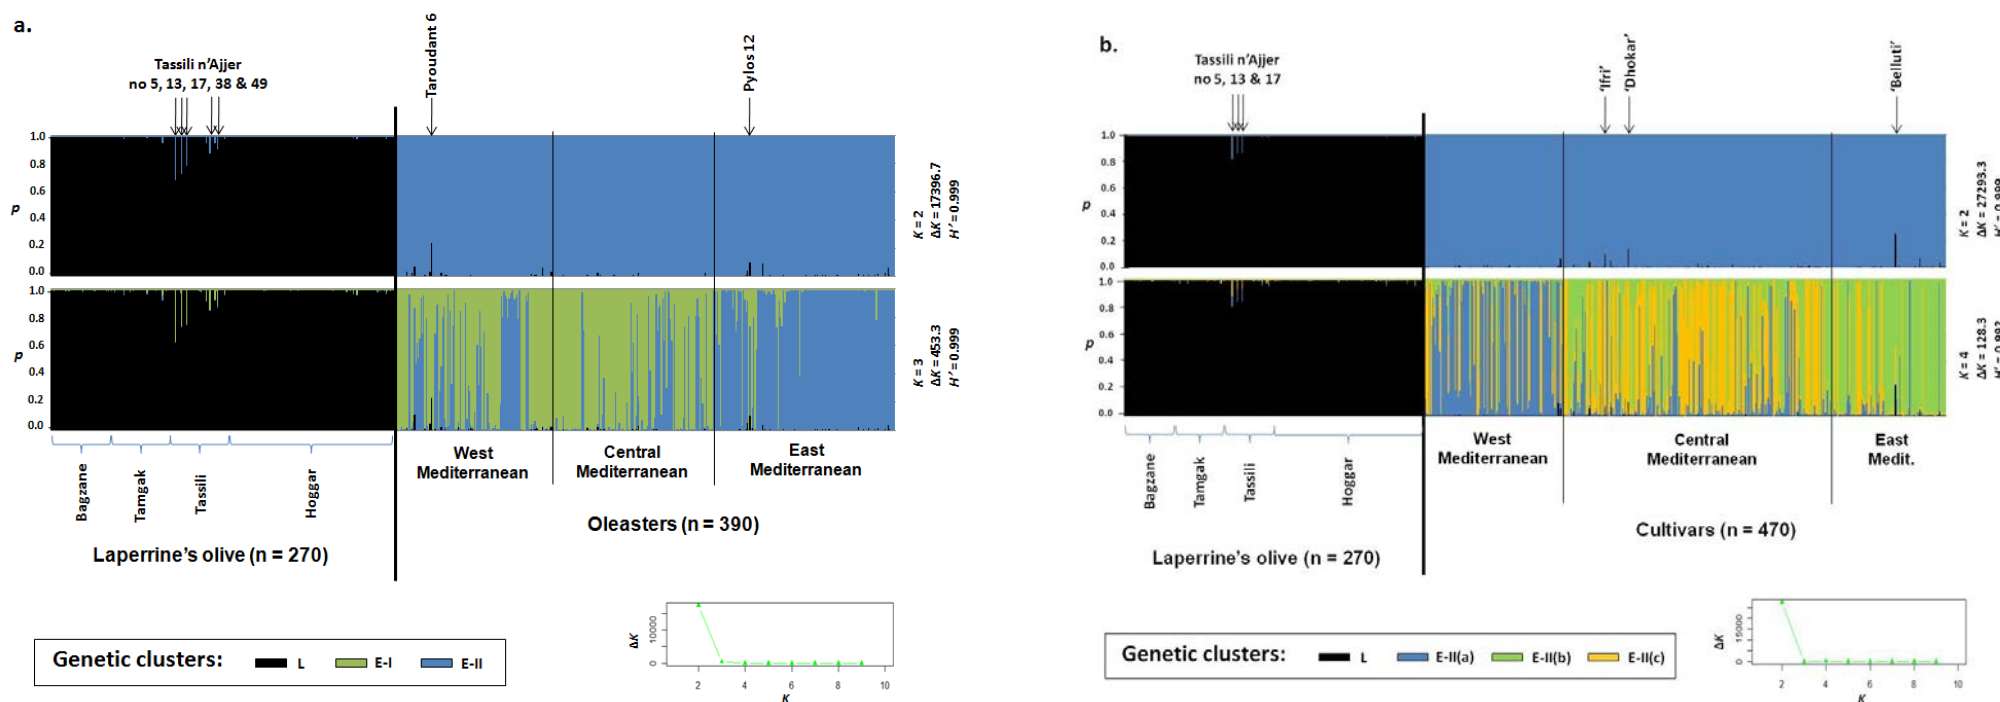

FIG. S4. Simulation of early and advanced generations of backcrosses between western oleasters and Laperrine's olive. Fifty genotypes of both Laperrine's olive (from Tassili n'Ajjer and Hoggar) and oleasters (from the west-central Mediterranean gene pool) were randomly selected. Aiming to exclude recent hybrids, these genotypes were randomly selected among individuals assigned to the Laperrine's olive or oleaster populations with  $p > 0.99$  (Figure 3). We then generated 100 genotypes of each F1 and successive backcrossed genotypes (from BC1 to BC5) with HYBRIDLAB (Nielsen *et al.* 2006). The genotypes were used to carry out admixture analyses with STRUCTURE v.2.3.4 (Pritchard *et al.* 2000) for  $K = 2$  clusters. **a)** Results for successive backcrosses in the western Mediterranean oleaster gene pool. The mean assignment to the Laperrine's olive cluster (with the standard deviation) is indicated at the bottom of the plot. As expected, the assignment level to cluster L progressively decreases in advanced generations of backcrosses. **b)** Results for successive backcrosses in the Laperrine's olive gene pool. The mean assignment to the western oleaster cluster (with the standard deviation) is indicated at the bottom of the plot. As expected, the assignment level to cluster WO progressively decreases in advanced generations of backcrosses.

**a. Back-crosses in the western Mediterranean oleaster gene pool**

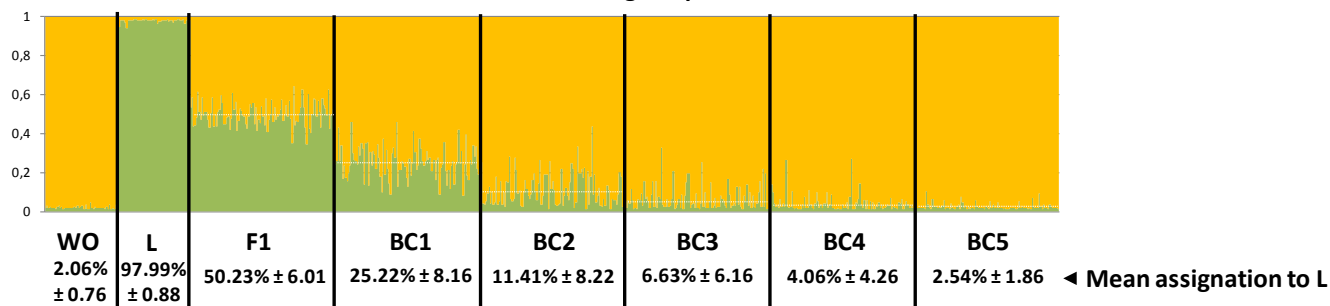

**b. Back-crosses in the Laperrine's olive gene pool**

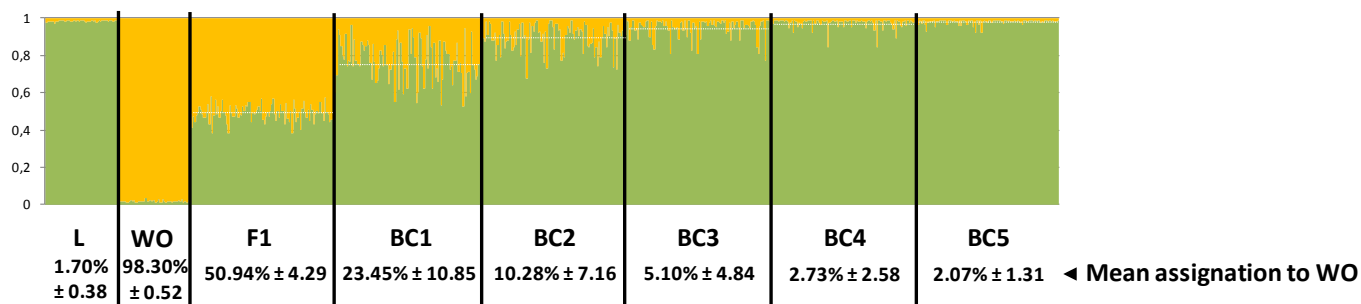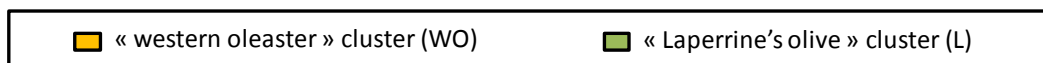

FIG. S5. Simulation of early and advanced generations of backcrosses between Central Mediterranean cultivars and Laperrine's olive. Fifty genotypes of both Laperrine's olive (from Tassili n'Ajjer and Hoggar) and olive varieties from the central Mediterranean gene pool were randomly selected. Aiming to exclude recent hybrids, these genotypes were randomly selected among individuals assigned to the Laperrine's olive population with  $p > 0.99$  or olive varieties with  $p > 0.95$  (Figure 3). We then generated 100 genotypes of each F1 and successive backcrossed genotypes (from BC1 to BC5) with HYBRIDLAB (Nielsen *et al.* 2006). The genotypes were used to carry out admixture analyses with STRUCTURE v.2.3.4 (Pritchard *et al.* 2000) for  $K = 2$  clusters. **a)** Results for successive backcrosses in the cultivar gene pool. The mean assignment to the Laperrine's olive cluster (with the standard deviation) is indicated at the bottom of the plot. As expected, the assignment level to cluster L progressively decreases in advanced generations of backcrosses. **b)** Results for successive backcrosses in the Laperrine's olive gene pool. The mean assignment to the cultivar cluster (with the standard deviation) is indicated at the bottom of the plot. As expected, the assignment level to cluster CC progressively decreases in advanced generations of backcrosses.

In both cases (Figures S4 and S5), when the contribution of a parental taxon decreases, the assignment level to its corresponding cluster similarly decreases. In our dataset, ten individuals were recognized as early-generations of hybrids between Mediterranean and Saharan olives. The assignment level of such trees to the "minor" parental contributor ranges from 31.7 to 10.1%. When this assignment level exceeds 20%, the trees likely correspond to a BC1 generation (i.e. Tassili no 5, 13 and 17, "Belluti", Taroudant no 6), while an assignment level around 10-12% may correspond to a BC2 generation. In any case, the confidence interval is quite large and these values remain indicative. To improve the approach, it is obvious that the use of a higher number of loci can help to better assess the contribution of each gene pool in advanced generations of backcrosses (e.g. Vähä & Primmer 2006).

**a. Back-crosses in the Central Mediterranean cultivated gene pool**

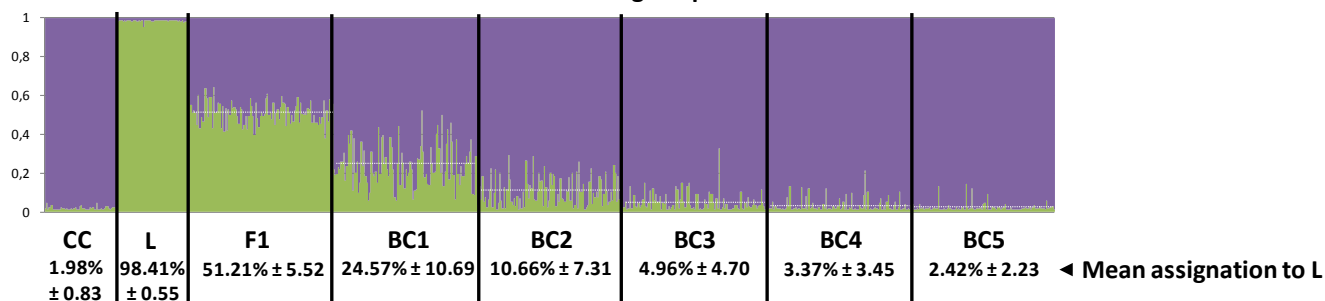

**b. Back-crosses in the Laperrine's olive gene pool**

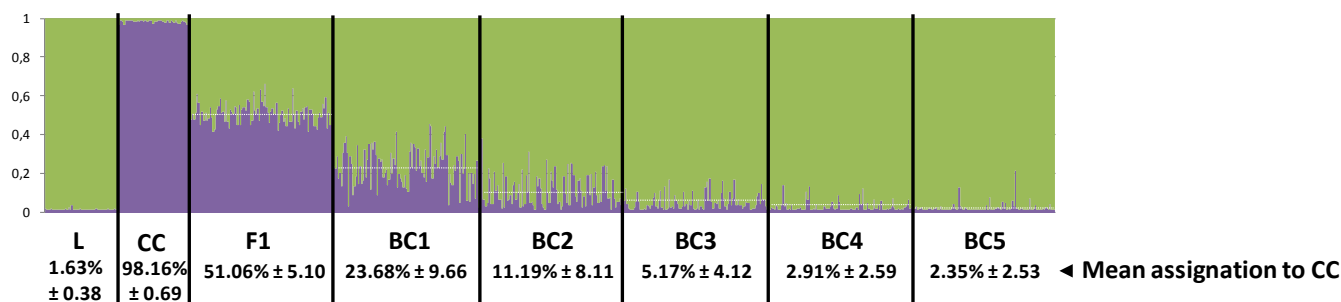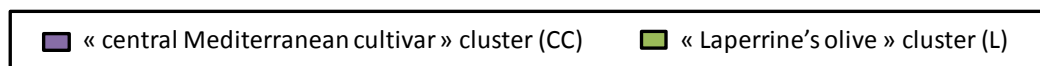

## LITERATURE CITED

- Belaj A, del Carmen Dominguez-García M, Atienza SG, et al. 2012.** Developing a core collection of olive (*Olea europaea* L.) based on molecular markers (DArTs, SSRs, SNPs) and agronomic traits. *Tree Genetics & Genomes* **8**: 365–378.
- Besnard G, Hernández P, Khadari B, Dorado G, Savolainen V. 2011.** Genomic profiling of plastid DNA variation in the Mediterranean olive tree. *BMC Plant Biology* **11**: 80.
- Besnard G, Khadari B, Navascués M, et al. 2013.** Genetic legacy of the Mediterranean olive tree: from Late Quaternary diversification to primary domestication. *Proceedings of the Royal Society, London, Series B*, in press.
- Díez CM, Imperato A, Rallo L, Baranco D, Trujillo I. 2012.** Worldwide core collection of olive cultivars based on simple sequence repeat and morphological markers. *Crop Science* **52**: 211–221.
- Evanno G, Regnaut S, Goudet J. 2005.** Detecting the number of clusters of individuals using the software STRUCTURE: a simulation study. *Molecular Ecology* **14**: 2611–2620.
- Haouane H, El Bakkali A, Moukhli A, et al. 2011.** Genetic structure and core collection of the World Olive Germplasm Bank of Marrakech: towards the optimised management and use of Mediterranean olive genetic resources. *Genetica* **139**: 1083–1094.
- Nielsen EEG, Bach LA, Kotlicki P. 2006.** HYBRIDLAB (version 1.0): a program for generating simulated hybrids from population samples. *Molecular Ecology Notes* **6**: 971–973.
- Pritchard JK, Stephens M, Donnelly P. 2000.** Inference of population structure from multilocus genotype data. *Genetics* **155**: 945–959.
- Vähä JP, Primmer CR. 2006.** Efficiency of model-based Bayesian methods for detecting hybrid individuals under different hybridization scenarios and with different numbers of loci. *Molecular Ecology* **15**, 63–72.
